# Supplementary material for: Phenol-rich alternatives for Rosa x damascena Mill. Efficient phytochemical profiling using different extraction methods and colorimetric assays
Source: PubMed Central journal article supplement (PMC8668888; doi:10.1038/s41598-021-03337-1), 2021-12-13
Supplement: 41598_2021_3337_MOESM1_ESM.pdf [file 41598_2021_3337_MOESM1_ESM.pdf]

## Supplementary material

Phenol-rich alternatives for *Rosa x damascena* Mill.

Efficient phytochemical profiling using different extraction methods and colorimetric assays.

Zuzanna Piotrowicz<sup>a</sup>, Łukasz Tabisz<sup>a\*</sup>, Marta Waligórska<sup>a</sup>, Radosław Pankiewicz<sup>a</sup>, Bogusława Łęska<sup>a</sup>

<sup>a</sup> Faculty of Chemistry, Adam Mickiewicz University in Poznań, Uniwersytetu Poznańskiego 8, 61-614 Poznań

\* Corresponding author: [lukasz.tabisz@amu.edu.pl](mailto:lukasz.tabisz@amu.edu.pl)

**Table S1.** Extraction yields and antioxidant assay activities of extracts from five plant obtained using four distinct methodologies.

| Raw material                 | Extraction |                   |                  | ABTS ( <i>in vitro</i> radical scavenging potential) |                  |                   |                    | FRAP (Ferric ion reduction potential) |                   |                    |                     | Folin-Ciocalteu (total phenolics) |                   |                    |                     | Al <sup>3+</sup> Complexation (flavonoids) |                  |                   |                    |                    |
|------------------------------|------------|-------------------|------------------|------------------------------------------------------|------------------|-------------------|--------------------|---------------------------------------|-------------------|--------------------|---------------------|-----------------------------------|-------------------|--------------------|---------------------|--------------------------------------------|------------------|-------------------|--------------------|--------------------|
|                              | Method     | Material mass [g] | Extract mass [g] | Yield [%]                                            | Extract [mgTE/g] | Material [mgTE/g] | Crop min [kgTE/ha] | Crop max [kgTE/ha]                    | Extract [mgFeE/g] | Material [mgFeE/g] | Crop min [kgFeE/ha] | Crop max [kgFeE/ha]               | Extract [mgGAE/g] | Material [mgGAE/g] | Crop min [kgGAE/ha] | Crop max [kgGAE/ha]                        | Extract [mgQE/g] | Material [mgQE/g] | Crop min [kgQE/ha] | Crop max [kgQE/ha] |
| <i>Calendula officinalis</i> | SOX        | 10.027            | 3.529            | 35.195                                               | 20.97            | 7.38              | 3.69               | 10.11                                 | 9.12              | 3.21               | 1.61                | 4.40                              | 45.32             | 15.95              | 7.98                | 21.85                                      | 19.77            | 6.96              | 3.48               | 9.53               |
|                              | UAE        | 10.026            | 1.661            | 16.567                                               | 14.86            | 2.46              | 1.23               | 3.37                                  | 7.08              | 1.17               | 0.59                | 1.61                              | 29.08             | 4.82               | 2.41                | 6.60                                       | 12.83            | 2.12              | 1.06               | 2.91               |
|                              | MAE        | 1.009             | 0.210            | 20.813                                               | 14.59            | 3.04              | 1.52               | 4.16                                  | 6.95              | 1.45               | 0.72                | 1.98                              | 47.29             | 9.84               | 4.92                | 13.48                                      | 23.65            | 4.92              | 2.46               | 6.74               |
|                              | SFE        | 1.200             | 0.054            | 4.500                                                | 111.75           | 5.03              | 2.51               | 6.89                                  | 11.74             | 0.53               | 0.26                | 0.72                              | 22.36             | 1.01               | 0.50                | 1.38                                       | 7.54             | 0.34              | 0.17               | 0.46               |
| <i>Matricaria chamomilla</i> | SOX        | 10.004            | 4.132            | 41.303                                               | 49.66            | 20.51             | 6.15               | 10.26                                 | 28.56             | 11.80              | 3.54                | 5.90                              | 61.56             | 25.43              | 7.63                | 12.71                                      | 14.64            | 6.05              | 1.81               | 3.02               |
|                              | UAE        | 10.006            | 1.441            | 14.401                                               | 36.03            | 5.19              | 1.56               | 2.59                                  | 15.98             | 2.30               | 0.69                | 1.15                              | 49.18             | 7.08               | 2.12                | 3.54                                       | 14.03            | 2.02              | 0.61               | 1.01               |
|                              | MAE        | 1.026             | 0.178            | 17.349                                               | 42.43            | 7.36              | 2.21               | 3.68                                  | 21.58             | 3.74               | 1.12                | 1.87                              | 52.95             | 9.19               | 2.76                | 4.59                                       | 16.12            | 2.80              | 0.84               | 1.40               |
|                              | SFE        | 1.959             | 0.043            | 2.195                                                | 27.11            | 0.60              | 0.18               | 0.30                                  | 19.85             | 0.44               | 0.13                | 0.22                              | 25.94             | 0.57               | 0.17                | 0.28                                       | 7.33             | 0.16              | 0.05               | 0.08               |
| <i>Sambucus nigra</i>        | SOX        | 19.754            | 7.406            | 37.491                                               | 81.72            | 30.64             | 3.12               | 6.46                                  | 41.92             | 15.72              | 1.60                | 3.32                              | 115.92            | 43.46              | 4.43                | 9.17                                       | 16.23            | 6.08              | 0.62               | 1.28               |
|                              | UAE        | 19.721            | 2.498            | 12.667                                               | 75.58            | 9.57              | 0.98               | 2.02                                  | 42.88             | 5.43               | 0.55                | 1.15                              | 100.43            | 12.72              | 1.30                | 2.68                                       | 27.59            | 3.49              | 0.36               | 0.74               |
|                              | MAE        | 2.079             | 0.256            | 12.314                                               | 82.39            | 10.15             | 1.03               | 2.14                                  | 45.11             | 5.56               | 0.57                | 1.17                              | 102.10            | 12.57              | 1.28                | 2.65                                       | 20.08            | 2.47              | 0.25               | 0.52               |
|                              | SFE        | 4.085             | 0.096            | 2.350                                                | 11.71            | 0.28              | 0.03               | 0.06                                  | 6.40              | 0.15               | 0.02                | 0.03                              | 23.25             | 0.55               | 0.06                | 0.12                                       | 15.43            | 0.36              | 0.04               | 0.08               |
| <i>Salvia officinalis</i>    | SOX        | 19.368            | 2.442            | 12.608                                               | 101.91           | 12.85             | 5.76               | 21.60                                 | 56.51             | 7.13               | 3.19                | 11.98                             | 74.79             | 9.43               | 4.22                | 15.85                                      | 18.28            | 2.31              | 1.03               | 3.87               |
|                              | UAE        | 19.330            | 1.353            | 6.999                                                | 81.72            | 5.72              | 2.56               | 9.62                                  | 37.82             | 2.65               | 1.19                | 4.45                              | 61.78             | 4.32               | 1.94                | 7.27                                       | 12.93            | 0.90              | 0.41               | 1.52               |
|                              | MAE        | 2.081             | 0.180            | 8.650                                                | 87.69            | 7.59              | 3.40               | 12.75                                 | 44.98             | 3.89               | 1.74                | 6.54                              | 65.38             | 5.65               | 2.53                | 9.51                                       | 17.26            | 1.49              | 0.67               | 2.51               |
|                              | SFE        | 3.252             | 0.155            | 4.766                                                | 135.65           | 6.47              | 2.90               | 10.87                                 | 55.83             | 2.66               | 1.19                | 4.47                              | 80.87             | 3.85               | 1.73                | 6.48                                       | 10.70            | 0.51              | 0.23               | 0.86               |
| <i>Rosa damascena</i>        | SOX        | 10.006            | 4.423            | 44.203                                               | 708.46           | 313.17            | 20.67              | 50.42                                 | 203.54            | 89.97              | 5.94                | 14.49                             | 233.93            | 103.41             | 6.82                | 16.65                                      | 20.49            | 9.06              | 0.60               | 1.46               |
|                              | UAE        | 10.056            | 2.536            | 25.219                                               | 177.57           | 44.78             | 2.96               | 7.21                                  | 69.74             | 17.59              | 1.16                | 2.83                              | 106.15            | 26.77              | 1.77                | 4.31                                       | 16.61            | 4.19              | 0.28               | 0.67               |
|                              | MAE        | 1.042             | 0.279            | 26.775                                               | 291.44           | 78.04             | 5.15               | 12.56                                 | 93.91             | 25.14              | 1.66                | 4.05                              | 64.16             | 17.18              | 1.13                | 2.77                                       | 20.75            | 5.56              | 0.37               | 0.89               |
|                              | SFE        | 1.345             | 0.134            | 9.963                                                | 18.14            | 1.81              | 0.12               | 0.29                                  | 2.34              | 0.23               | 0.02                | 0.04                              | 8.03              | 0.80               | 0.05                | 0.13                                       | 7.14             | 0.71              | 0.05               | 0.11               |

**Table S2.** Fatty acid and microelement content from five plant obtained using four distinct methodologies.

| Raw material                 | GC - Saturated fatty acids |                    |                     |                     | GC - Unsaturated fatty acids |                    |                     |                     | ICP-OES [mg microelement/g of extract] |       |       |       |       |       |
|------------------------------|----------------------------|--------------------|---------------------|---------------------|------------------------------|--------------------|---------------------|---------------------|----------------------------------------|-------|-------|-------|-------|-------|
|                              | Extract [mgSFA/g]          | Material [mgSFA/g] | Crop min [kgSFA/ha] | Crop max [kgSFA/ha] | Extract [mgUFA/g]            | Material [mgUFA/g] | Crop min [kgUFA/ha] | Crop max [kgUFA/ha] | Na                                     | Zn    | Fe    | Cu    | Cr    | Total |
| <i>Calendula officinalis</i> | 40.00                      | 14.08              | 7.04                | 19.29               | 21.00                        | 7.39               | 3.70                | 10.13               | 0.050                                  | 0.000 | 0.024 | 0.000 | 0.000 | 0.075 |
|                              | 29.00                      | 4.80               | 2.40                | 6.58                | 16.00                        | 2.65               | 1.33                | 3.63                | 0.033                                  | 0.000 | 0.017 | 0.000 | 0.000 | 0.050 |
|                              | 61.00                      | 12.70              | 6.35                | 17.39               | 21.00                        | 4.37               | 2.19                | 5.99                | 0.033                                  | 0.000 | 0.015 | 0.000 | 0.000 | 0.049 |
|                              | 75.00                      | 3.38               | 1.69                | 4.62                | 26.00                        | 1.17               | 0.59                | 1.60                | 0.004                                  | 0.000 | 0.002 | 0.000 | 0.000 | 0.006 |
| <i>Matricaria chamomilla</i> | 25.00                      | 10.33              | 3.10                | 5.16                | 42.00                        | 17.35              | 5.20                | 8.67                | 0.030                                  | 0.001 | 0.010 | 0.000 | 0.000 | 0.041 |
|                              | 26.00                      | 3.74               | 1.12                | 1.87                | 44.00                        | 6.34               | 1.90                | 3.17                | 0.017                                  | 0.000 | 0.008 | 0.000 | 0.000 | 0.025 |
|                              | 31.00                      | 5.38               | 1.61                | 2.69                | 45.00                        | 7.81               | 2.34                | 3.90                | 0.015                                  | 0.000 | 0.008 | 0.000 | 0.000 | 0.023 |
|                              | 53.00                      | 1.16               | 0.35                | 0.58                | 55.00                        | 1.21               | 0.36                | 0.60                | 0.002                                  | 0.000 | 0.001 | 0.000 | 0.000 | 0.003 |
| <i>Sambucus nigra</i>        | 14.00                      | 5.25               | 0.54                | 1.11                | 24.00                        | 9.00               | 0.92                | 1.90                | 0.000                                  | 0.000 | 0.005 | 0.000 | 0.001 | 0.007 |
|                              | 30.00                      | 3.80               | 0.39                | 0.80                | 51.00                        | 6.46               | 0.66                | 1.36                | 0.000                                  | 0.000 | 0.003 | 0.000 | 0.000 | 0.004 |
|                              | 47.00                      | 5.79               | 0.59                | 1.22                | 79.00                        | 9.73               | 0.99                | 2.05                | 0.000                                  | 0.000 | 0.003 | 0.000 | 0.000 | 0.003 |
|                              | 54.00                      | 1.27               | 0.13                | 0.27                | 112.00                       | 2.63               | 0.27                | 0.56                | 0.000                                  | 0.000 | 0.000 | 0.000 | 0.000 | 0.000 |
| <i>Salvia officinalis</i>    | 18.00                      | 2.27               | 1.02                | 3.82                | 25.00                        | 3.15               | 1.41                | 5.30                | 0.001                                  | 0.000 | 0.010 | 0.000 | 0.000 | 0.011 |
|                              | 25.00                      | 1.75               | 0.78                | 2.94                | 30.00                        | 2.10               | 0.94                | 3.53                | 0.000                                  | 0.000 | 0.007 | 0.000 | 0.000 | 0.007 |
|                              | 22.00                      | 1.90               | 0.85                | 3.20                | 25.00                        | 2.16               | 0.97                | 3.64                | 0.000                                  | 0.000 | 0.008 | 0.000 | 0.000 | 0.008 |
|                              | 24.00                      | 1.14               | 0.51                | 1.92                | 30.00                        | 1.43               | 0.64                | 2.40                | 0.000                                  | 0.000 | 0.001 | 0.000 | 0.000 | 0.001 |
| <i>Rosa damascena</i>        | 3.00                       | 1.33               | 0.09                | 0.21                | 2.00                         | 0.88               | 0.06                | 0.14                | 0.000                                  | 0.001 | 0.053 | 0.001 | 0.014 | 0.069 |
|                              | 7.00                       | 1.77               | 0.12                | 0.28                | 5.00                         | 1.26               | 0.08                | 0.20                | 0.000                                  | 0.000 | 0.054 | 0.000 | 0.013 | 0.067 |
|                              | 9.00                       | 2.41               | 0.16                | 0.39                | 5.00                         | 1.34               | 0.09                | 0.22                | 0.000                                  | 0.000 | 0.054 | 0.000 | 0.014 | 0.068 |
|                              | 29.00                      | 2.89               | 0.19                | 0.47                | 17.00                        | 1.69               | 0.11                | 0.27                | 0.000                                  | 0.000 | 0.003 | 0.000 | 0.002 | 0.004 |

**Table S3.** Detailed fatty acid composition of plant extracts obtained by four different methodologies. Fatty acids are shown as total carbon atoms : unsaturated bonds. Results are given as % of extract mass (+ denotes concentration above LOD, but below LOQ).

| Raw material                 | Extraction | 6:0 | 8:0 | 10:0 | 12:0 | 14:0 | 15:0 | 16:0 | 16:1 | 17:0 | 18:00 | 18:1 | 18:2 | 18:3 | 20:0 | 20:1 | 20:2 | 20:3 n-6 | 20:3 n-3 | 20:4 | 21:0 | 22:0 | 22:1 | 22:2 | 23:0 | 24:0 | 24:1 |     |
|------------------------------|------------|-----|-----|------|------|------|------|------|------|------|-------|------|------|------|------|------|------|----------|----------|------|------|------|------|------|------|------|------|-----|
| <i>Calendula officinalis</i> | SOX        |     |     | +    | 0.2  | 1.1  |      | 2.1  | 0.1  | 0.1  | 0.3   | 0.1  | 1.0  | 0.8  | 0.1  |      | 0.1  |          | +        |      |      | 0.1  |      |      |      |      |      |     |
|                              | UAE        |     | +   | +    | 0.1  | 0.7  |      | 1.6  | +    | 0.1  | 0.3   | 0.1  | 0.8  | 0.6  | +    |      | 0.1  |          |          |      |      | 0.1  |      | +    |      |      |      |     |
|                              | MAE        |     | 0.1 | 0.1  | 0.4  | 1.8  |      | 2.8  | +    | 0.1  | 0.6   | 0.3  | 1.0  | 0.7  | +    |      | 0.1  |          |          |      |      | 0.1  |      |      | +    |      | 0.1  |     |
|                              | SFE        |     | 0.1 | 0.0  | 0.4  | 2.4  | +    | 3.7  | 0.1  | 0.1  | 0.7   | 0.3  | 1.1  | 1.0  | 0.1  |      |      |          |          |      |      | 0.1  |      |      |      | +    |      | 0.1 |
| <i>Matricaria chamomilla</i> | SOX        |     |     |      | 0.3  | +    | 0.1  | +    | 1.7  | 0.1  | 0.1   | 0.2  | 0.5  | 2.3  | 1.3  | 0.1  |      | +        |          |      |      |      |      |      |      |      |      | +   |
|                              | UAE        |     | +   | +    | 0.2  | +    | 0.1  | +    | 1.7  | 0.1  | 0.2   | 0.2  | 0.4  | 2.4  | 1.5  | 0.1  |      |          | +        | +    |      | 0.1  |      |      |      |      |      |     |
|                              | MAE        |     | +   | +    | 0.3  | +    | 0.1  | +    | 1.9  | +    | 0.1   | 0.3  | 0.5  | 2.5  | 1.5  | 0.1  |      |          |          |      |      | 0.1  |      |      |      |      | 0.2  | +   |
|                              | SFE        |     | 0.1 | 0.1  | 0.6  | 0.1  | 0.2  | +    | 2.5  | +    | 0.1   | 0.5  | 0.7  | 2.9  | 1.6  | 0.2  |      |          |          |      |      | 0.1  | 0.2  | +    | 0.3  | +    |      | 0.6 |
| <i>Sambucus nigra</i>        | SOX        |     |     |      | +    |      |      | 1.2  | 0.1  | +    | 0.1   | 0.4  | 1.0  | 0.9  | +    |      |      |          |          |      |      | +    |      |      |      |      | 0.1  |     |
|                              | UAE        |     | +   | +    |      |      |      | 2.2  | 0.1  | 0.2  | 0.2   | 1.0  | 2.0  | 2.0  | 0.1  |      | +    |          |          |      |      | +    | 0.1  | +    | +    | 0.2  | +    |     |
|                              | MAE        |     | +   | +    | 0.1  | +    | 0.1  | +    | 3.6  | 0.2  |       | 0.3  | 1.6  | 3.0  | 3.0  | 0.1  | 0.1  | +        | +        |      | +    | +    | 0.2  | +    | +    | 0.3  | +    |     |
|                              | SFE        |     |     |      | +    | +    | 0.2  | +    | 4.5  | 0.3  | 0.1   | 0.4  | 3.0  | 3.8  | 4.0  | 0.2  |      | +        |          |      |      |      |      | 0.1  | +    |      |      |     |
| <i>Salvia officinalis</i>    | SOX        |     |     |      | +    | +    |      | 1.2  | 0.1  | 0.1  | 0.2   | 0.6  | 0.7  | 1.0  | 0.1  | +    | 0.1  |          |          |      | +    |      | 0.1  | +    |      |      | 0.1  |     |
|                              | UAE        |     | +   | 0.1  | +    | +    |      | 1.6  | +    | 0.1  | 0.3   | 0.7  | 0.9  | 1.3  | 0.1  | +    | 0.1  |          |          |      | +    | +    | 0.1  | +    |      | 0.2  |      |     |
|                              | MAE        |     | +   | 0.1  | 0.1  | +    |      | 1.5  | +    | 0.1  | 0.3   | 0.6  | 0.8  | 1.0  | 0.1  |      | 0.1  |          |          |      |      | 0.1  |      |      |      |      |      |     |
|                              | SFE        |     |     |      | +    | +    |      | 1.4  | 0.1  | 0.1  | 0.3   | 0.7  | 0.9  | 0.8  | 0.1  | +    | 0.1  | 0.2      | 0.2      |      |      |      | 0.1  |      |      |      | 0.4  |     |
| <i>Rosa damascena</i>        | SOX        |     | +   | +    | +    | +    |      | 0.2  | +    | 0.1  | +     | 0.1  | +    | 0.1  | +    |      |      |          |          |      |      | +    |      |      |      |      |      |     |
|                              | UAE        |     | 0.0 | 0.1  | 0.0  | 0.0  |      | 0.4  | +    | +    | 0.2   | +    | 0.1  | 0.4  | +    |      |      |          |          |      |      |      | +    |      |      |      | +    |     |
|                              | MAE        |     | 0.1 | 0.0  | 0.1  | 0.1  |      | 0.4  | +    | +    | 0.2   | 0.1  | 0.1  | 0.3  | +    |      |      |          |          |      |      |      | +    |      |      |      | +    |     |
|                              | SFE        |     | 0.0 | 0.1  | 0.2  | 0.1  |      | 1.2  | +    | 0.1  | 0.6   | 0.1  | 0.8  | 0.7  | 0.2  |      |      |          |          |      |      |      | 0.2  |      | 0.1  |      |      | 0.2 |

**Table S4.** Detailed microelement composition of extracts obtained by four different methodologies.

| Raw material                 | Extraction | Amount of microelement in extract [ppm] |       |        |       |       | Σ      |
|------------------------------|------------|-----------------------------------------|-------|--------|-------|-------|--------|
|                              |            | Na                                      | Zn    | Fe     | Cu    | Cr    |        |
| <i>Calendula officinalis</i> | SOX        | 50.23                                   | 0.248 | 23.89  | 0.193 | <LOQ  | 74.561 |
|                              | UAE        | 33.22                                   | 0.021 | 16.82  | 0.138 | <LOQ  | 50.199 |
|                              | MAE        | 33.21                                   | 0.021 | 15.44  | 0.128 | <LOQ  | 48.799 |
|                              | SFE        | 4.052                                   | 0.016 | 1.976  | 0.007 | <LOQ  | 6.051  |
| <i>Matricaria chamomilla</i> | SOX        | 30.01                                   | 0.52  | 10.11  | 0.221 | <LOQ  | 40.861 |
|                              | UAE        | 16.92                                   | 0.057 | 8.021  | 0.131 | <LOQ  | 25.129 |
|                              | MAE        | 15.23                                   | 0.067 | 7.942  | 0.134 | <LOQ  | 23.373 |
|                              | SFE        | 1.823                                   | 0.032 | 1.023  | 0.015 | <LOQ  | 2.893  |
| <i>Sambucus nigra</i>        | SOX        | 0.443                                   | 0.322 | 5.021  | 0.154 | 0.722 | 6.662  |
|                              | UAE        | 0.289                                   | 0.178 | 3.021  | 0.081 | <LOQ  | 3.569  |
|                              | MAE        | 0.227                                   | 0.167 | 2.986  | 0.078 | <LOQ  | 3.458  |
|                              | SFE        | 0.034                                   | 0.012 | 0.097  | 0.003 | <LOQ  | 0.146  |
| <i>Salvia officinalis</i>    | SOX        | 0.5                                     | 0.11  | 10.112 | 0.081 | <LOQ  | 10.803 |
|                              | UAE        | 0.38                                    | 0.09  | 6.901  | 0.042 | <LOQ  | 7.413  |
|                              | MAE        | 0.337                                   | 0.087 | 7.772  | 0.043 | <LOQ  | 8.239  |
|                              | SFE        | 0.276                                   | 0.051 | 0.543  | 0.02  | <LOQ  | 0.890  |
| <i>Rosa damascena</i>        | SOX        | 0.423                                   | 0.671 | 52.61  | 1.121 | 14.25 | 69.075 |
|                              | UAE        | 0.231                                   | 0.294 | 53.65  | 0.134 | 12.71 | 67.019 |
|                              | MAE        | 0.233                                   | 0.325 | 53.62  | 0.134 | 13.52 | 67.832 |
|                              | SFE        | 0.112                                   | 0.021 | 2.601  | 0.032 | 1.501 | 4.267  |
